# Supplementary material for: Genetic diversity and population structure of Botryosphaeria dothidea and Neofusicoccum parvum on English walnut (Juglans regia L.) in France
Source: PubMed Central journal article supplement — Sci Rep. 2024 Aug 27;14:19817. doi: 10.1038/s41598-024-67613-6 (PMC11350086; doi:10.1038/s41598-024-67613-6), 2024-08-27
Supplement: 41598_2024_67613_MOESM1_ESM.pdf [file 41598_2024_67613_MOESM1_ESM.pdf]

**Genetic diversity and population structure of *Botryosphaeria dothidea* and *Neofusicoccum parvum* on English walnut (*Juglans regia* L.) in France**

Marie Belair<sup>1</sup>, Adeline Picot<sup>1</sup>, Olivier Lepais<sup>2</sup>, Cyrielle Masson<sup>3</sup>, Marie-Neige Hébrard<sup>4</sup>, Aude Moronvalle<sup>5</sup>, Gwénaëlle Comont<sup>6</sup>, Victor M. Gabri Martin<sup>7</sup>, Sylvie Tréguer<sup>1</sup>, Yohana Laloum<sup>5</sup>, Marie-France Corio-Costet<sup>6</sup>, Themis J. Michailides<sup>7</sup>, Juan Moral<sup>8</sup>, Gaétan Le Floch<sup>1</sup>, Flora Pensec<sup>1,\*</sup>

<sup>1</sup> Univ Brest, INRAE, Laboratoire Universitaire de Biodiversité et Écologie Microbienne, F-29280 Plouzané, France

<sup>2</sup> Univ. Bordeaux, INRAE, BIOGECO, 33610 Cestas, France

<sup>3</sup> Station d'expérimentation Nucicole Rhône Alpes, 38160 Chatte, France

<sup>4</sup> Station Expérimentale de Creysse, Perrical 46600 Creysse, France

<sup>5</sup> Centre Technique Interprofessionnel des Fruits et Légumes, Centre opérationnel de Lanxade, 24130 Prignonrieux, France

<sup>6</sup> INRAE, UMR Santé et Agroécologie du Vignoble, ISVV, Labex Cote, CS 20032, 33882 Villenave d'Ornon, France

<sup>7</sup> University of California Davis, Department of Plant Pathology, Kearney Agricultural Research and Extension Center, Parlier, CA, 93648, USA

<sup>8</sup> Department of Agronomy (Maria de Maetzu Excellence Unit), University of Córdoba, Campus de Rabanales, 14071 Córdoba, Spain

\* corresponding author : [flora.pensec@univ-brest.fr](mailto:flora.pensec@univ-brest.fr)

A

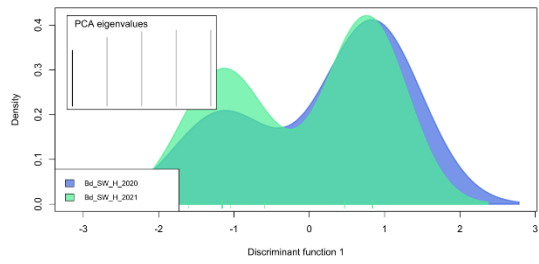

B

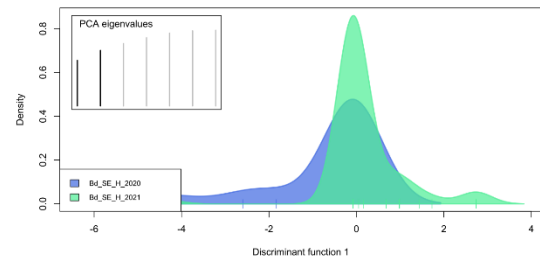

C

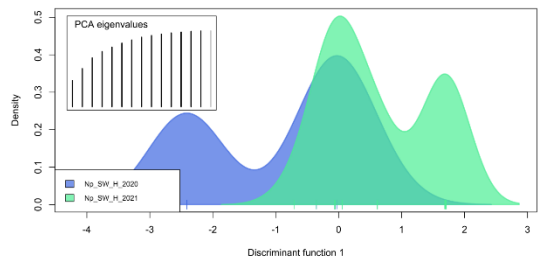

D

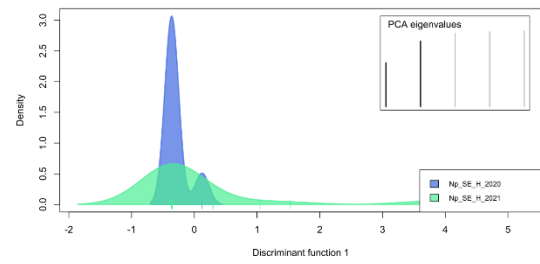

**Supplementary Figure S1.** Discriminant Analysis of Principal Components (DAPC) of *B. dothidea* (A and B) and *N. parvum* (C and D) populations. Populations were distinguished according to the geographical origin (South-West \_SW, A and C; and South-East \_SE, B and D) and the year of sampling (2020 and 2021) of the walnut husks (H).

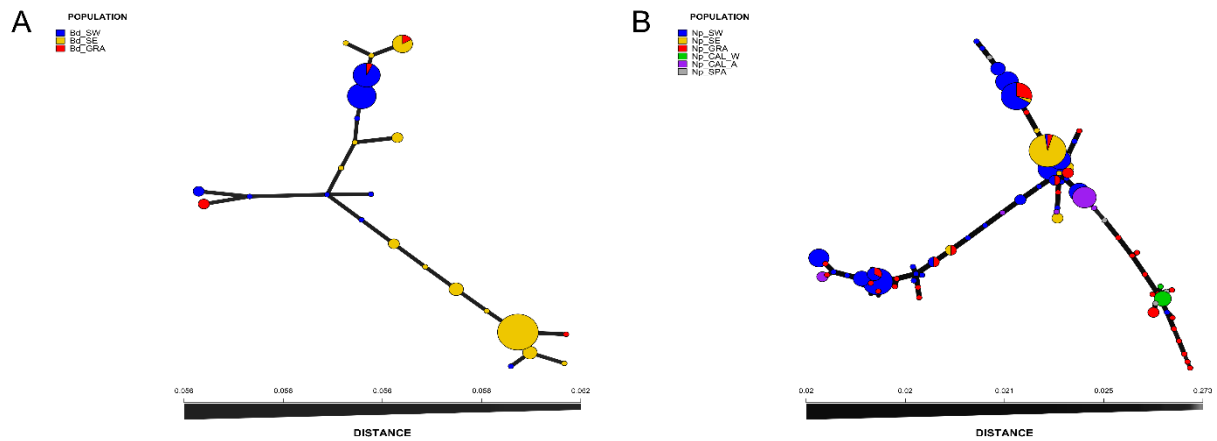

**Supplementary Figure S2.** Minimum spanning networks of MLGs of *B. dothidea* (A) and *N. parvum* (B) populations. The networks were based on Bruvo's distance and were generated for the southwestern (SW) and the southeastern (SE) French walnut-producing areas, the French vineyard population (GRA), the Californian walnut (CAL\_W) and almond (CAL\_A) trees and the Spanish walnut trees (SPA) populations. MLGs are represented by nodes (circles) and edges (lines) representing the genetic distance between individuals. The size of the nodes corresponds to the number of individuals sharing the same MLG.

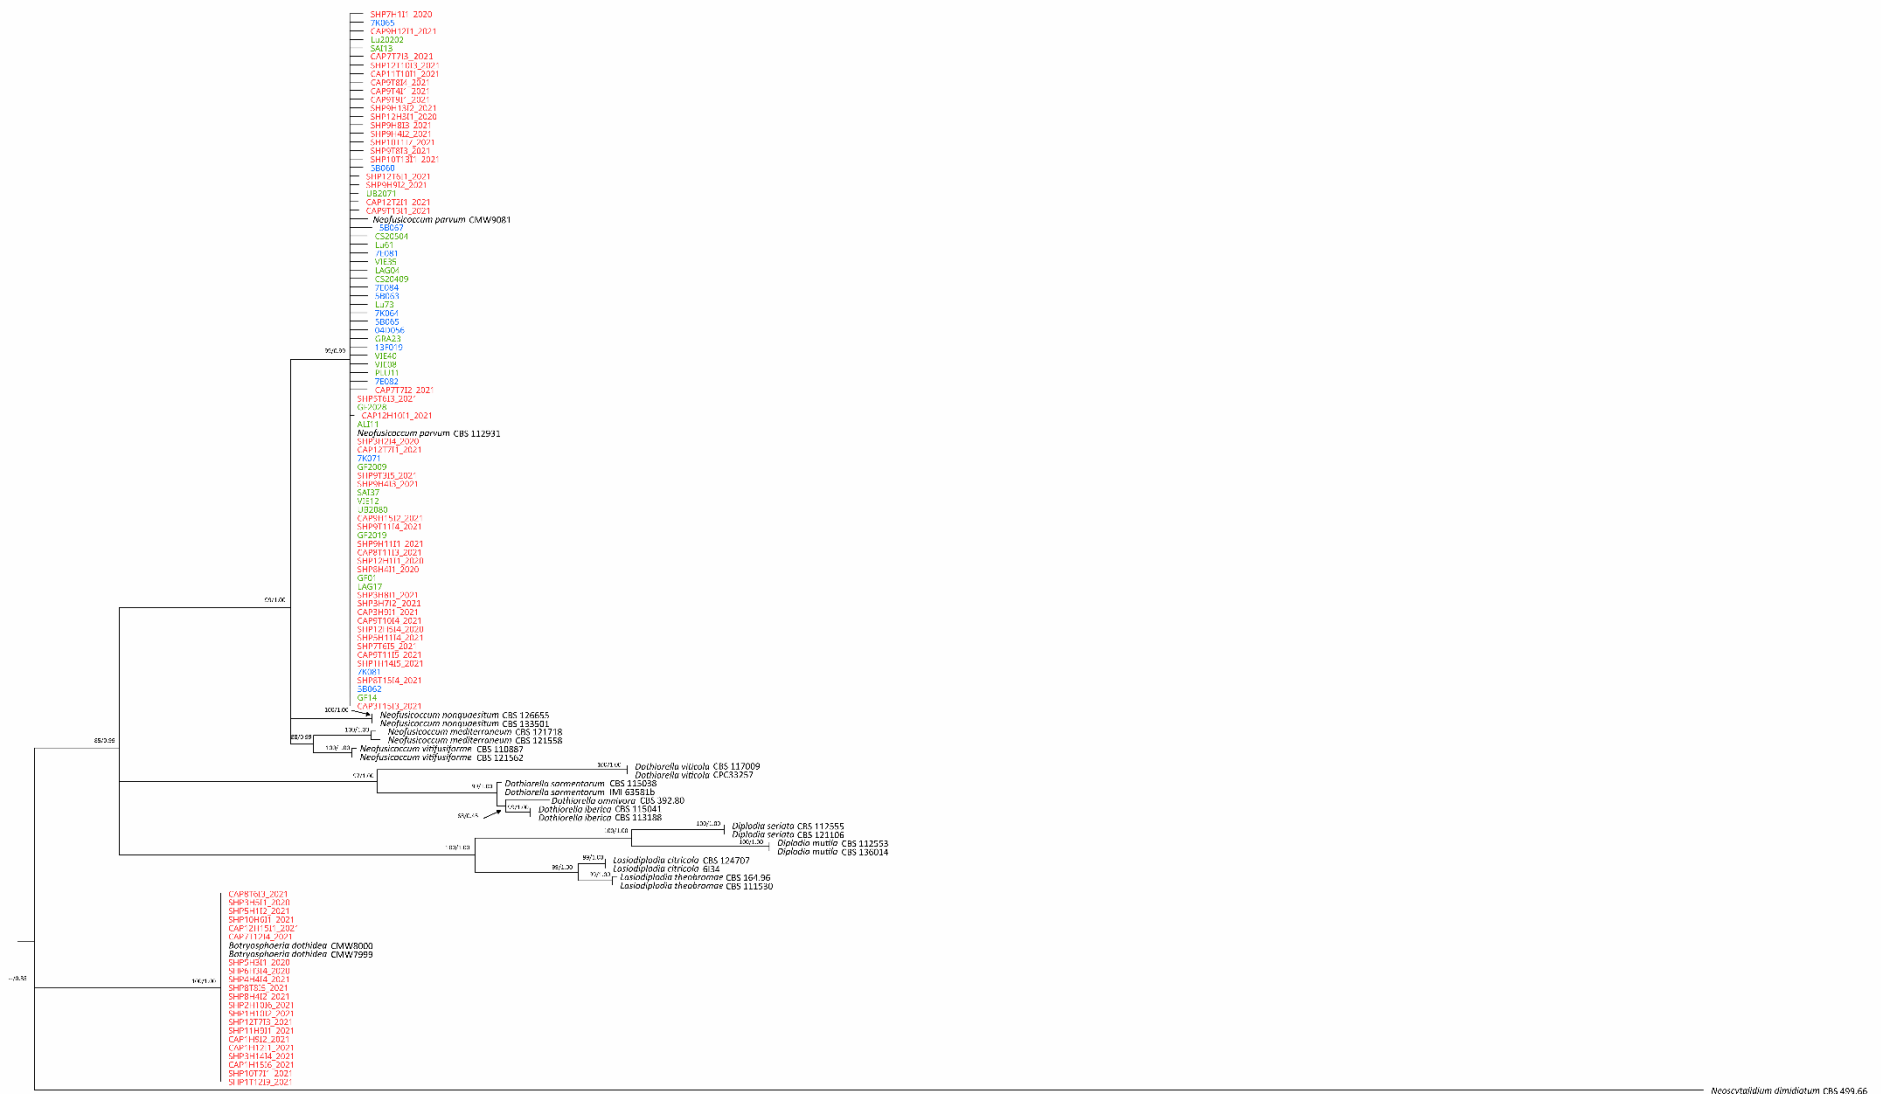

**Supplementary Figure S3.** Maximum-Likelihood phylogenetic consensus tree based on ITS, EF1- $\alpha$  and TUB loci of fungal species belonging to Botryosphaeriaceae. Maximum-likelihood bootstrap supports (> 60%) and Bayesian posterior probabilities are represented at nodes (left and right, respectively). The tree was rooted with *Neoscytalidium dimidiatum* CBS 499.66. Red isolates: French walnut trees collection; Green isolates: French vineyards collection; Blue isolates: Californian and Spain collection.

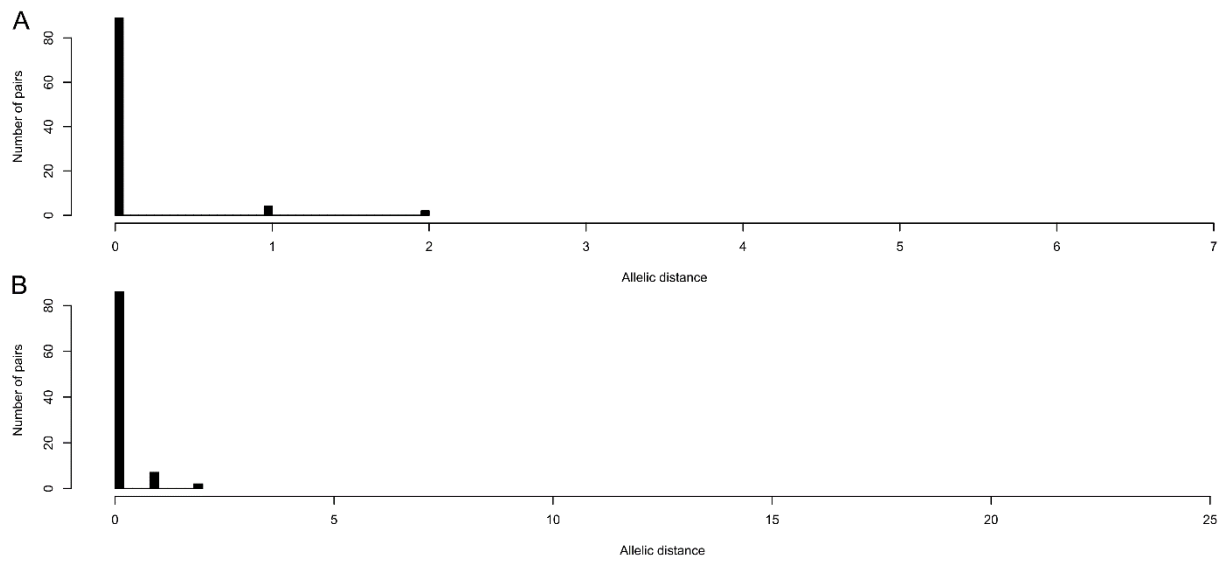

**Supplementary Figure S4.** Allelic distance between pairs of *B. dothidea* (A) and *N. parvum* (B) individuals sequenced twice.

**Supplementary Table S1.** Analysis of molecular variance (AMOVA) for *B. dothidea* and *N. parvum* strains among and within regions.

| Species            | Source of variation                 | Uncorrected dataset |                |                     |                         | Clone-corrected dataset |                |                     |                         |
|--------------------|-------------------------------------|---------------------|----------------|---------------------|-------------------------|-------------------------|----------------|---------------------|-------------------------|
|                    |                                     | Degree of freedom   | Sum of squares | Variance components | Explained variation (%) | Degree of freedom       | Sum of squares | Variance components | Explained variation (%) |
| <i>B. dothidea</i> | Between regions                     | 1                   | 107.81         | 1.93                | 64.66                   | 1                       | 8.58           | 0.58                | 20.74                   |
|                    | Between individuals within orchards | 131                 | 138.63         | 1.06                | 35.34                   | 20                      | 44.51          | 2.23                | 79.26                   |
|                    | Total                               | 132                 | 246.44         | 2.99                | 100                     | 21                      | 53.09          | 2.81                | 100                     |
| <i>N. parvum</i>   | Between regions                     | 1                   | 62.82          | 0.89                | 22.31                   | 1                       | 7.94           | 0.31                | 6.61                    |
|                    | Between individuals within orchards | 154                 | 476.42         | 3.09                | 77.69                   | 38                      | 165.97         | 4.37                | 93.39                   |
|                    | Total                               | 155                 | 539.24         | 3.98                | 100                     | 39                      | 173.91         | 4.68                | 100                     |

**Supplementary Table S2.** Descriptive statistics and indices of genetic diversity of *B. dothidea* and *N. parvum* populations based on the organ type (Husk \_H and twig \_T) in the two main French walnut-producing areas (South-West \_SW and South-East \_SE).

| Species            | Population | Nb of individuals | AR  | uh (s.d.)        | P(%)  | MLG | eMLG |
|--------------------|------------|-------------------|-----|------------------|-------|-----|------|
| <i>B. dothidea</i> | Bd_SW_H    | 22                | 2.1 | 0.102<br>(0.043) | 54.55 | 7   | 6.05 |
|                    | Bd_SW_T    | 17                | 2.0 | 0.083<br>(0.031) | 45.45 | 5   | 5    |
|                    | Bd_SE_H    | 76                | 1.7 | 0.087<br>(0.032) | 72.73 | 12  | 4.55 |
|                    | Bd_SE_T    | 18                | 1.5 | 0.030<br>(0.016) | 27.27 | 4   | 3.83 |
| <i>N. parvum</i>   | Np_SW_H    | 46                | 2.3 | 0.179<br>(0.037) | 85.19 | 17  | 7.44 |
|                    | Np_SW_T    | 61                | 3.2 | 0.124<br>(0.033) | 51.85 | 24  | 9.15 |
|                    | Np_SE_H    | 37                | 1.6 | 0.041<br>(0.014) | 37.04 | 7   | 3.17 |
|                    | Np_SE_T    | 12                | 1.4 | 0.037<br>(0.014) | 22.22 | 2   | 2.00 |

s.d.: standard deviation; AR: allelic richness; uh: unbiased haploid genetic diversity; P(%): percentage of polymorphic loci; MLG: number of observed multilocus genotypes; eMLG: number of multilocus genotypes expected at the smallest sample size.

**Supplementary Table S3.** Analysis of molecular variance (AMOVA) for *B. dothidea* and *N. parvum* strains among and within organs.

| Species            | Source of variation               | Uncorrected data set |                |                     |                         | Clone-corrected data set |                |                     |                         |
|--------------------|-----------------------------------|----------------------|----------------|---------------------|-------------------------|--------------------------|----------------|---------------------|-------------------------|
|                    |                                   | Degree of freedom    | Sum of squares | Variance components | Explained variation (%) | Degree of freedom        | Sum of squares | Variance components | Explained variation (%) |
| <i>B. dothidea</i> | Between organs                    | 1                    | 4.55           | 0.05                | 2.76                    | 1                        | 1.03           | -0.11               | -4.81                   |
|                    | Between individuals within organs | 131                  | 241.89         | 1.85                | 97.24                   | 26                       | 61.00          | 2.35                | 104.81                  |
|                    | Total                             | 132                  | 246.44         | 1.90                | 100                     | 27                       | 62.03          | 2.24                | 100                     |
| <i>N. parvum</i>   | Between organs                    | 1                    | 8.30           | 0.06                | 1.78                    | 1                        | 2.27           | -0.10               | -2.21                   |
|                    | Between individuals within organs | 154                  | 530.95         | 3.45                | 98.22                   | 46                       | 215.96         | 4.70                | 102.21                  |
|                    | Total                             | 155                  | 539.25         | 3.51                | 100                     | 47                       | 218.23         | 4.60                | 100                     |



**Supplementary Table S4.** Geographical and plant origin of isolates of *B. dothidea* and *N. parvum*.

| Host         | Country                     | Number of isolates |                  |
|--------------|-----------------------------|--------------------|------------------|
|              |                             | <i>B. dothidea</i> | <i>N. parvum</i> |
| Grapevines   | France (Grand-Est)          | 1                  | 10               |
|              | France (Nouvelle-Aquitaine) | 3                  | 26               |
|              | France (Occitanie)          | 1                  | 7                |
|              | Total                       | 5                  | 43               |
| Walnut trees | USA (California)            | -                  | 5                |
|              | Spain                       | -                  | 5                |
|              | Total                       | -                  | 10               |
| Almond trees | USA (California)            | -                  | 14               |
|              | Total                       | -                  | 14               |
